# Supplementary material for: The medaka novel immune-type receptor (NITR) gene clusters reveal an extraordinary degree of divergence in variable domains
Source: PubMed Central journal article supplement (PMC2442602; doi:10.1186/1471-2148-8-177), 2008-06-19
Supplement: 1471-2148-8-177-S3.pdf [file 1471-2148-8-177-S3.pdf]

cdNA\_CR683680 1 -----MALLCILLALFSEFAPLAARSGVNDQPRVMAQVQOTITKFCGDSVTFFFWQCRIGCKEVLVSRMRHNVEVSVSPSKG-RBEIES  
cdNA\_CR675622 1 QDAKHVHTNYCISISCFLLHSLVLAGASSFVRPADGLFVVAAGYVETPCSCQSESMATAFWKOSLIGCKEVLVSRMRHNVEVSVSPSKG-RBEIES  
cdNA\_CR664265 1 QDAKHVHTNYCISISCFLLHSLVLAGASSFVRPADGLFVVAAGYVETPCSCQSESMATAFWKOSLIGCKEVLVSRMRHNVEVSVSPSKG-RBEIES  
cdNA\_CR725053 1 -----MALLCILLALFSEFAPLAARSGVNDQPRVMAQVQOTITKFCGDSVTFFFWQCRIGCKEVLVSRMRHNVEVSVSPSKG-RBEIES  
72801 1 -----MALLCILLALFSEFAPLAARSGVNDQPRVMAQVQOTITKFCGDSVTFFFWQCRIGCKEVLVSRMRHNVEVSVSPSKG-RBEIES  
77051 1 ---MVSINEDSISCFCLWSLVLDAEASLSPQVPSGLFANVCDKITPCPSRENSKNQFHWKOLIGCKERRS-IYKHARN-EFKEEFQSDIRLSNI  
81391 1 ---MVSINEASISCFCLWSLVLDAEASLSPQVPSGLFANVEDKMTPCPSRENSKNQFHWKOLIGCKERRS-IYKHARN-EFKEEFQSDIRLSNI  
85651 1 ---MVSINEASISCFCLWSLVLDAEASLSPQVPSGLFANVEDKMTPCPSRENSKNQFHWKOLIGCKERRS-IYKHARN-EFKEEFQSDIRLSNI  
89901 1 ---MVSINEASISCFCLWSLVLDAEASLSPQVPSGLFANVEDKMTPCPSRENSKNQFHWKOLIGCKERRS-IYKHARN-EFKEEFQSDIRLSNI  
96001 1 ---MVSINEASISCFCLWSLVLDAEASLSPQVPSGLFANVEDKMTPCPSRENSKNQFHWKOLIGCKERRS-IYKHARN-EFKEEFQSDIRLSNI  
99501 1 ---MVSINEASISCFCLWSLVLDAEASLSPQVPSGLFANVEDKMTPCPSRENSKNQFHWKOLIGCKERRS-IYKHARN-EFKEEFQSDIRLSNI  
104101 1 ---MTFAKVFVPLVCEKLAQATIDFES---QLGNRRISVVKQDNITPCPSRENSKNQFHWKOLIGCKERRS-IYKHARN-EFKEEFQSDIRLSNI  
109901 1 ---MASVKLIFPLMCKLEIKAAITMEFSSINWKNTEHVVKQDNITPCPSRENSKNQFHWKOLIGCKERRS-IYKHARN-EFKEEFQSDIRLSNI  
113101 1 ---MTFAFIFPLMCKLEIKAAITMEFSSINWKNTEHVVKQDNITPCPSRENSKNQFHWKOLIGCKERRS-IYKHARN-EFKEEFQSDIRLSNI  
116851 1 -----MTNIALITALLSTFISFSGCVFHTSVRRQDNITPCPSRENSKNQFHWKOLIGCKERRS-IYKHARN-EFKEEFQSDIRLSNI  
124301 1 ---MTSVTFFFPLMCKLEIKAAITMEFSSINWKNTEHVVKQDNITPCPSRENSKNQFHWKOLIGCKERRS-IYKHARN-EFKEEFQSDIRLSNI

cdNA\_CR683680 92 REGMNHITSDILFSDSAYVYCCILEFNLLQFEGGTFIVRTPLLNVRVAVYQPLGSSVPPDLSLPSVVRGERCKGQSFVWFQTAQPVIIHPLEG  
cdNA\_CR675622 101 TDQSCPTTANLISISDSATYYCYSSYVPEQLDKIYIVVTSLHLNPEVEHRLPESLQAGCSGILNCTVHTGTCDELSVYWRSSGSEPELIIYHR  
cdNA\_CR664265 101 TDQSCPTTANLISISDSATYYCYSSYVPEQLDKIYIVVTSLHLNPEVEHRLPESLQAGCSGILNCTVHTGTCDELSVYWRSSGSEPELIIYHR  
cdNA\_CR725053 64 DDKLANITADIEFSDSAYVYCCILEFNLLQFEGGTFIVRTPLLNVRVAVYQPLGSSVPPDLSLPSVVRGERCKGQSFVWFQTAQPVIIHPLEG  
72801 62 DDKLANITADIEFSDSAYVYCCILEFNLLQFEGGTFIVRTPLLNVRVAVYQPLGSSVPPDLSLPSVVRGERCKGQSFVWFQTAQPVIIHPLEG  
77051 98 TGGCPLTIANLISISDSATYYCYSSYVPEQLDKIYIVVTSLHLNPEVEHRLPESLQAGCSGILNCTVHTGTCDELSVYWRSSGSEPELIIYHR  
81391 98 TGRNYHTTIGLISFSDSAYVYCCILEFNLLQFEGGTFIVRTPLLNVRVAVYQPLGSSVPPDLSLPSVVRGERCKGQSFVWFQTAQPVIIHPLEG  
85651 98 TGRNYHTTIGLISFSDSAYVYCCILEFNLLQFEGGTFIVRTPLLNVRVAVYQPLGSSVPPDLSLPSVVRGERCKGQSFVWFQTAQPVIIHPLEG  
89901 98 TGRNYHTTIGLISFSDSAYVYCCILEFNLLQFEGGTFIVRTPLLNVRVAVYQPLGSSVPPDLSLPSVVRGERCKGQSFVWFQTAQPVIIHPLEG  
96001 98 TGRNYHTTIGLISFSDSAYVYCCILEFNLLQFEGGTFIVRTPLLNVRVAVYQPLGSSVPPDLSLPSVVRGERCKGQSFVWFQTAQPVIIHPLEG  
99501 98 TGRNYHTTIGLISFSDSAYVYCCILEFNLLQFEGGTFIVRTPLLNVRVAVYQPLGSSVPPDLSLPSVVRGERCKGQSFVWFQTAQPVIIHPLEG  
104101 98 TGRNYHTTIGLISFSDSAYVYCCILEFNLLQFEGGTFIVRTPLLNVRVAVYQPLGSSVPPDLSLPSVVRGERCKGQSFVWFQTAQPVIIHPLEG  
109901 95 DNKGVNITSHLIEFSDSAYVYCCILEFNLLQFEGGTFIVRTPLLNVRVAVYQPLGSSVPPDLSLPSVVRGERCKGQSFVWFQTAQPVIIHPLEG  
113101 97 HSKGVNITSHLIEFSDSAYVYCCILEFNLLQFEGGTFIVRTPLLNVRVAVYQPLGSSVPPDLSLPSVVRGERCKGQSFVWFQTAQPVIIHPLEG  
116851 87 DSVLTHITTKQVSDSAYVYCCILEFNLLQFEGGTFIVRTPLLNVRVAVYQPLGSSVPPDLSLPSVVRGERCKGQSFVWFQTAQPVIIHPLEG  
124301 98 HSKGVNITSHLIEFSDSAYVYCCILEFNLLQFEGGTFIVRTPLLNVRVAVYQPLGSSVPPDLSLPSVVRGERCKGQSFVWFQTAQPVIIHPLEG

cdNA\_CR683680 192 KCVNEARGK-----CILTYSIHSANSDEGVYCAACCGRIIFGCGNLTQTKGSAQALLVGFSAMLAVSIVLFAFAFTAGTKNIGCSVCK  
cdNA\_CR675622 201 ARNDHCKGK-----NTCFYNSLSTKNTS-KAGTYTCAVAACCGRIIFGCGNLTQTKGSAQALLVGFSAMLAVSIVLFAFAFTAGTKNIGCSVCK  
cdNA\_CR664265 201 ARNDHCKGK-----NTCFYNSLSTKNTS-KAGTYTCAVAACCGRIIFGCGNLTQTKGSAQALLVGFSAMLAVSIVLFAFAFTAGTKNIGCSVCK  
cdNA\_CR725053 160 GRNQCKKKT-----NTCFYNSLSTKNTS-KAGTYTCAVAACCGRIIFGCGNLTQTKGSAQALLVGFSAMLAVSIVLFAFAFTAGTKNIGCSVCK  
72801 192 KCVNEARGK-----CILTYSIHSANSDEGVYCAACCGRIIFGCGNLTQTKGSAQALLVGFSAMLAVSIVLFAFAFTAGTKNIGCSVCK  
77051 198 ARNDHCKGKNTCFYNSLSTKNTS-KAGTYTCAVAACCGRIIFGCGNLTQTKGSAQALLVGFSAMLAVSIVLFAFAFTAGTKNIGCSVCK  
81391 198 ARNDHCKGK-----NTCFYNSLSTKNTS-KAGTYTCAVAACCGRIIFGCGNLTQTKGSAQALLVGFSAMLAVSIVLFAFAFTAGTKNIGCSVCK  
85651 198 ARNDHCKGK-----NTCFYNSLSTKNTS-KAGTYTCAVAACCGRIIFGCGNLTQTKGSAQALLVGFSAMLAVSIVLFAFAFTAGTKNIGCSVCK  
89901 198 ARNDHCKGK-----NTCFYNSLSTKNTS-KAGTYTCAVAACCGRIIFGCGNLTQTKGSAQALLVGFSAMLAVSIVLFAFAFTAGTKNIGCSVCK  
96001 198 ARNDHCKGK-----NTCFYNSLSTKNTS-KAGTYTCAVAACCGRIIFGCGNLTQTKGSAQALLVGFSAMLAVSIVLFAFAFTAGTKNIGCSVCK  
99501 198 ARNDHCKGK-----NTCFYNSLSTKNTS-KAGTYTCAVAACCGRIIFGCGNLTQTKGSAQALLVGFSAMLAVSIVLFAFAFTAGTKNIGCSVCK  
104101 191 SRNQCKKKT-----RTCFYS-LKNINISQNGTYTCAVAACCGRIIFGCGNLTQTKGSAQALLVGFSAMLAVSIVLFAFAFTAGTKNIGCSVCK  
109901 194 KSRNECKKKT-----NTCFYNSLSTKNTS-KAGTYTCAVAACCGRIIFGCGNLTQTKGSAQALLVGFSAMLAVSIVLFAFAFTAGTKNIGCSVCK  
113101 193 GRNQCKKKT-----NTCFYNSLSTKNTS-KAGTYTCAVAACCGRIIFGCGNLTQTKGSAQALLVGFSAMLAVSIVLFAFAFTAGTKNIGCSVCK  
116851 159 IRLQCKKAT-----RTNEDLDSIQNYASLDQEAQRKRSFENPNS  
124301 194 GSKNQCKKKT-----NTCFYNSLSTKNTS-KAGTYTCAVAACCGRIIFGCGNLTQTKGSAQALLVGFSAMLAVSIVLFAFAFTAGTKNIGCSVCK

cdNA\_CR683680 285 GTVAHQ-----PSACDPTDAGDVRVAAELKSSRHSDAEDNQCESLVCYLKIN-----  
cdNA\_CR675622 294 DIQTDPS-----LEMSEMIOQDNVHYAALNHNHVSRRKRESSGNCVYSVVTLOAS-----  
cdNA\_CR664265 294 DIQTDPS-----LEMSEMIOQDNVHYAALNHNHVSRRKRESSGNCVYSVVTLOAS-----  
cdNA\_CR725053 285 GTVAHQ-----PSACDPTDAGDVRVAAELKSSRHSDAEDNQCESLVCYLKIN-----  
72801 292 DIQTDPS-----LEMSEMIOQDNVHYAALNHNHVSRRKRESSGNCVYSVVTLOAS-----  
77051 292 DIQTDPS-----LEMSEMIOQDNVHYAALNHNHVSRRKRESSGNCVYSVVTLOAS-----  
81391 292 DIQTDPS-----LEMSEMIOQDNVHYAALNHNHVSRRKRESSGNCVYSVVTLOAS-----  
85651 292 DIQTDPS-----LEMSEMIOQDNVHYAALNHNHVSRRKRESSGNCVYSVVTLOAS-----  
89901 292 DIQTDPS-----LEMSEMIOQDNVHYAALNHNHVSRRKRESSGNCVYSVVTLOAS-----  
96001 291 DIQTDAS-----FEMSEMIOQDNVHYAALNHNHVSRRKRESSGNCVYSVVTLOAS-----  
99501 291 EQSGPS-----FNMSEMIOQDNVHYAALNHNHVSRRKRESSGNCVYSVVTLOAS-----  
104101 278 LDKESQRLFAESTASIGDQCEANHYAALNHNHVSRRKRESSGNCVYSVVTLOAS-----  
109901 284 HLLDSQRLFPVGTANIGDQCEANHYAALNHNHVSRRKRESSGNCVYSVVTLOAS-----  
113101 284 YLSDSQRLFPVGTANIGDQCEANHYAALNHNHVSRRKRESSGNCVYSVVTLOAS-----  
116851 202 -----FTNVTYATL-----  
124301 284 HLLDTHSRLPVAPTANIGDQCEANHYAALNHNHVSRRKRESSGNCVYSVVTLOAS-----
