# Supplementary material for: The medaka novel immune-type receptor (NITR) gene clusters reveal an extraordinary degree of divergence in variable domains
Source: PubMed Central journal article supplement (PMC2442602; doi:10.1186/1471-2148-8-177), 2008-06-19
Supplement: 1471-2148-8-177-S4.pdf [file 1471-2148-8-177-S4.pdf]

| <b>Gene</b> | <b>Primary Primer Sequence</b>      | <b>Nested Primer Sequence</b>      |
|-------------|-------------------------------------|------------------------------------|
| NITR1       | CGCCAGAAATCCAAACAGGKGACACC          | <u>ATGGKGACACCTGCTCAGTTTGTSGT</u>  |
| NITR2       | AGCAGGTTTCAGAAAA <u>ATGACTCTTST</u> | <u>ATGACTCTTSTSGTGTTTKCTGGCTG</u>  |
| NITR3       | TYTGCTGTGCANACA <u>ATGGTGAACCT</u>  | <u>ATGGTGAACCTTACCTTGGTTCTGGYT</u> |
| NITR5       | CAGCCGTTTTAGAAC <u>ATGACTCTTCTG</u> | <u>ATGACTCTTSTSGTGTTTKCTGGCTG</u>  |
| NITR6       | AGAGGCTKTGCCACA <u>ATGAGAGGACT</u>  | <u>ATGAGAGGACTGGCTCTYTTWATCCT</u>  |
| NITR8       | GACCAATACAAAATG <u>ATGATTCTGTT</u>  | <u>ATGATTCTGTTTTATGTASTTTYAT</u>   |
| NITR9       | GAGAGCTCTGAGAAG <u>ATGCAGCTGCG</u>  | <u>ATGCAGCTGCGTGTGATCCTCTGTGG</u>  |
| NITR10      | TAAGAAGTTCAGAAA <u>ATGCATGTTGT</u>  | <u>ATGCATGTTGTACTTTGTTCACTKCT</u>  |
| NITR11      | CWGTTYARSACAGA <u>ATGWGGAGCCTC</u>  | <u>ATGWGGAGCCTCRYCRTAACARYTT</u>   |
| NITR12      | ATTGAGTACAGAATG <u>ATGGGCTTGAC</u>  | <u>ATGGGCTTGACCTCAATACTGTCTTT</u>  |
| NITR13      | AGAATCTGGACATG <u>ATGATTTCTAAGC</u> | <u>ATGATTTCTAAGCTCTTTGTTTTCTT</u>  |
| NITR14      | ACAAAAATCCAAAC <u>ATGGAGACATCTG</u> | <u>ATGGAGACATCTGCTCACATTGTTTT</u>  |
| NITR16      | GCCAGAATCCAAAC <u>ATGGTGACACCT</u>  | <u>ATGGTGACACCTGCTCAGTTTGTGCGT</u> |
| NITR17      | AAAATCTGAAGACT <u>ATGGCATCCATA</u>  | <u>ATGGCATCCATACCATGTGCGATCTT</u>  |
| NITR18      | GAAGGAAATGCAGCA <u>ATGATCAGAGGA</u> | <u>ATGATCAGAGGACTGGCTGCTTTGAT</u>  |
| NITR20      | TTTGATGTGCCACA <u>ATGATCAGAGGG</u>  | <u>ATGATCRGAGRGCTGGCTRCTTCA</u>    |
| NITR22      | GTTTTTGTGTCACA <u>ATGCAAGGAGGA</u>  | <u>ATGCAAGGAGGACAGATCACTTTCAT</u>  |
| NITR24      | AGAAGTTTAGAAAA <u>ATGCATGTCGTA</u>  | <u>ATGCATGTCGTACTTTCCACACTACT</u>  |
