# Supplementary material for: The medaka novel immune-type receptor (NITR) gene clusters reveal an extraordinary degree of divergence in variable domains
Source: PubMed Central journal article supplement (PMC2442602; doi:10.1186/1471-2148-8-177), 2008-06-19
Supplement: 1471-2148-8-177-S6.pdf [file 1471-2148-8-177-S6.pdf]

NITR12 cDNA                   K S F Q K A ▼ P S E H Q H T E ▼ S L E S N I  
 AAATCTTTTCAGAAGGCT CCGTCTGAGCACCAGCACACAGAG AGCCTGGAATCCAACATT  
 NITR12a genomic           AAATCTTTTCAGAAAGCT CCGTCTGAGCGCCAGCACAGAGAG AGCCTGGAATCCAACGTT  
 \*\*\*\*\* \*\* \*\*\*\*\* \*\* \*\*\*\*\* \*\* \*\*\*\*\* \*\*  
                           K S F Q K A P S E R Q H R E S L E S N V

NITR12 cDNA                   L N Y A A L T F Q P K S K T Q R G P G P  
 CTTAACATATGCAGCCCTGACATTCCAGCCAAAATCTAAAACCCA GAGAGGTCCAGGACCT  
 NITR12a genomic           CGATACTATGCAGCCCTGACATTCCAGCCAAAACCTGAAACCCA-----  
 \* \*\*\*\*\* \*\* \*\*\*\*\* \*\* \*\*\*\*\* \*\*  
                           R Y Y A A L T F Q P K P E T Q

NITR12 cDNA                   E T -  
 GAGACTTAA CCAGACCA AAGCATATCTGTATATAAAAACAGATTCA TCATCTGCTTTCTGA  
 NITR12a genomic           -----AAGCATATCTGTATATAAAAACCGATTCA-----  
                                          \*\*\*\*\* \*\* \*\*\*\*\* \*\*  
                                          S I S V Y K T D S

NITR12 cDNA                   ACACTGGTGGGATTTCGTGTTT CAAAATGATAAAAAGAGGAA TTTGTCTGATGATTACATT  
 NITR12a genomic           -----GATCTGTGTTT-----TTGGTCT-----  
                                  \*\*\* \* \*\*\*\*\* \*\* \*\*\*\*\*  
                                  D L C F                                   W S

NITR12 cDNA                   CACCTAGGTGTGAATGTAAGTGTGCATGGGTGTGTGATTGTGGCCCTGCGACAGACTGG  
 NITR12a genomic           -----TAG-----  
                                  \*\*\*  
                                  -
