# Supplementary material for: The medaka novel immune-type receptor (NITR) gene clusters reveal an extraordinary degree of divergence in variable domains
Source: PubMed Central journal article supplement (PMC2442602; doi:10.1186/1471-2148-8-177), 2008-06-19
Supplement: 1471-2148-8-177-S7.pdf [file 1471-2148-8-177-S7.pdf]

| <b>J or J-like sequence</b> | <b>NITR V domain</b>            | <b>NITR I domain</b>                                                           |
|-----------------------------|---------------------------------|--------------------------------------------------------------------------------|
| FGXGTXLXV                   |                                 | 10b, 24                                                                        |
| FGXGTXLXL                   |                                 | 1a, 1b, 1c, 1d,<br>1e, 2a, 2b, 2d,<br>4a, 4b, 5a, 5b,<br>5c, 7a, 13, 14,<br>15 |
| FGXGTXXVI                   |                                 | 4c, 18, 22                                                                     |
| FGXGTXXVL                   |                                 | 17                                                                             |
| FGXGTXXVM                   |                                 | 20                                                                             |
| FGXGTXLXM                   |                                 | 9a                                                                             |
| FGXGLXLXV                   | 9a, 9b, 9c                      |                                                                                |
| FGXTXXXVI                   |                                 | 6a, 6b, 6c                                                                     |
| FXXGTXLXV                   | 8a, 8b                          |                                                                                |
| FXXGVXXVXV                  | 7a                              |                                                                                |
| FXXGSXLXV                   | 6a, 6b, 6c                      |                                                                                |
| GXGTXLXM                    |                                 | 9b,9c                                                                          |
| GXGTXLXE                    |                                 | 8a, 8b                                                                         |
| FGXG                        |                                 | 21                                                                             |
| TXLXV                       | 3a, 3b, 3c, 3d,<br>12a, 12b, 23 |                                                                                |
| TXLXI                       | 11a, 11b                        |                                                                                |
