# Supplementary material for: The medaka novel immune-type receptor (NITR) gene clusters reveal an extraordinary degree of divergence in variable domains
Source: PubMed Central journal article supplement (PMC2442602; doi:10.1186/1471-2148-8-177), 2008-06-19
Supplement: 1471-2148-8-177-S8.pdf [file 1471-2148-8-177-S8.pdf]

| <b>ITIM or ITIM-like sequence</b> | <b>Associated with V domain</b>                                | <b>Associated with I domain</b>                        |
|-----------------------------------|----------------------------------------------------------------|--------------------------------------------------------|
| LXYXXV                            | 1a, 1b, 1c, 1d, 2b, 2d, 3a, 3b, 3c, 3d, 4a, 4b, 4c, 13, 14, 15 | 18                                                     |
| LXYXXL                            | 5a, 5b, 5c, 7a, 11b, 19, 21                                    |                                                        |
| LXYXXI                            | 16                                                             |                                                        |
| IXYXXL                            | 22                                                             |                                                        |
| SXYXXV                            | 18                                                             | 22                                                     |
| YXYXXV                            |                                                                | 1a                                                     |
| VXYXXA                            | 12a, 12b                                                       |                                                        |
| LXYXXA                            | 8a                                                             |                                                        |
| LXYXXP                            | 8b                                                             |                                                        |
| CXYXXV                            |                                                                | 1b, 1c, 1d, 2b, 2d, 4a, 4b, 4c, 5c, 7a, 13, 14, 15, 16 |
| AXYXXV                            |                                                                | 3a                                                     |
| VXYXXT                            | 10b                                                            | 3b, 3c, 11b                                            |
| VXYXXR                            | 11a                                                            |                                                        |
| TXYXXI                            |                                                                | 8b                                                     |
| SXYXXD                            |                                                                | 12a, 12b                                               |
| MXYXXL                            | 20                                                             |                                                        |
