# Supplementary material for: The medaka novel immune-type receptor (NITR) gene clusters reveal an extraordinary degree of divergence in variable domains
Source: PubMed Central journal article supplement (PMC2442602; doi:10.1186/1471-2148-8-177), 2008-06-19
Supplement: 1471-2148-8-177-S9.pdf [file 1471-2148-8-177-S9.pdf]

| <b>Receptor</b> | <b>Transmembrane domain</b>      | <b>Species shown</b> |
|-----------------|----------------------------------|----------------------|
| NITR9a, b, c    | LSVIR <b>T</b> GVLLLFLLSCVLFV    | Medaka               |
| Nitr9           | LSIAR <b>T</b> CLLLLVIVMVIIWYCVY | Zebrafish            |
| lpNITR2         | FSIVR <b>S</b> SVLLCCVILIMIYFCCS | Channel catfish      |
| lpNITR3         | LSVFR <b>R</b> GVLAFLIIFFTMYYNVL | Channel catfish      |
| lpNITR4         | LSIIR <b>S</b> AVLLLIFIICLLCTYIG | Channel catfish      |
| lpNITR10/11     | LSIFR <b>R</b> GVLAFMLLIFPIILIVE | Channel catfish      |
