# Supplementary material for: The medaka novel immune-type receptor (NITR) gene clusters reveal an extraordinary degree of divergence in variable domains
Source: PubMed Central journal article supplement (PMC2442602; doi:10.1186/1471-2148-8-177), 2008-06-19

**a**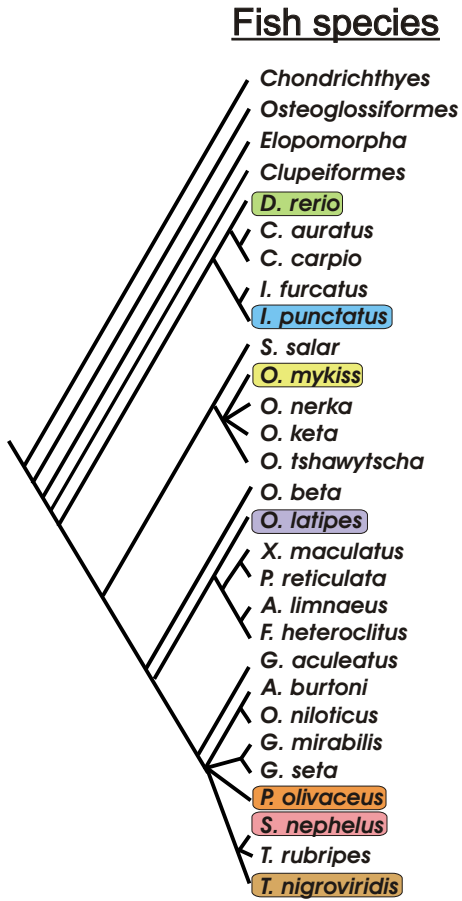**b**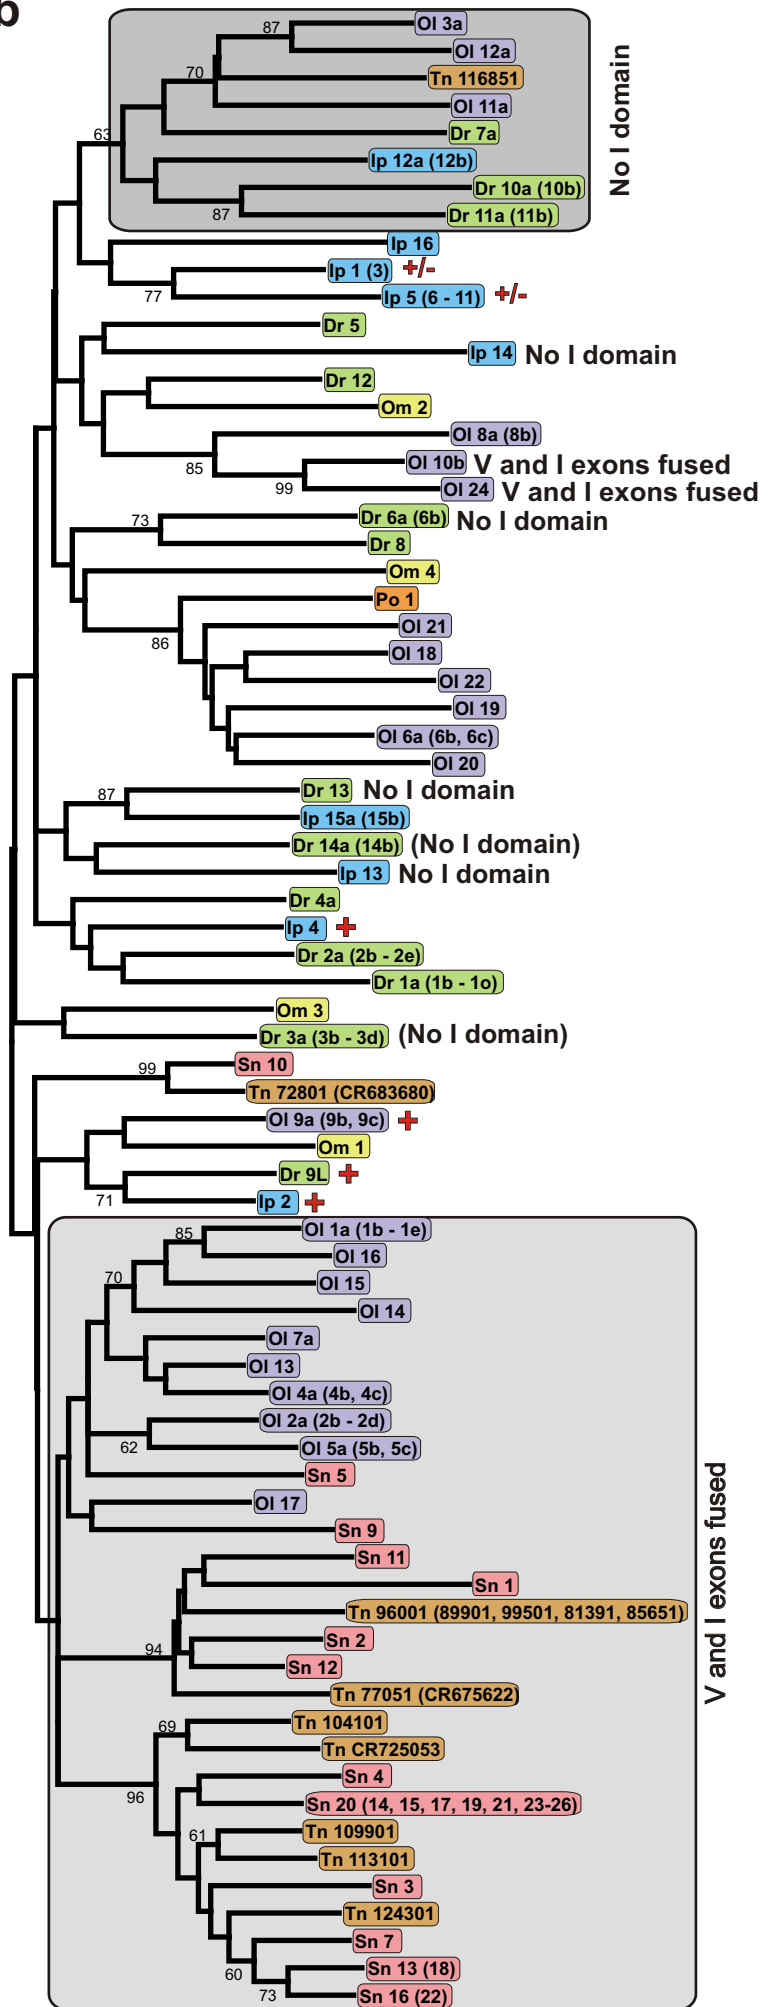

Supplement: 1471-2148-8-177-S12.pdf [file 1471-2148-8-177-S12.pdf]
